# Supplementary material
Source: HighWire-hosted journal article supplement (https://qualitysafety.bmj.com/highwire/filestream/163179/field_highwire_adjunct_files/1/bmjqs-2022-015390supp002_data_supplement.pdf)
Supplement: bmjqs-2022-015390supp002_data_supplement.pdf [file bmjqs-2022-015390supp002_data_supplement.pdf]

Supplementary appendix

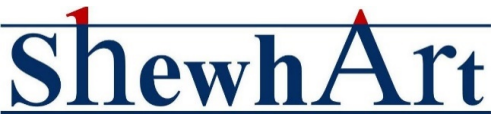

The economic benefits of surgical outcome monitoring using control charts: the SHEWHART cluster randomized trial

This appendix has been provided by the authors to give readers additional information about their work

Table of Contents

Appendix. Components of Control Chart–Based Program.....2

Appendix. Compliance with Control Chart–Based Program Implementation .....3

Appendix. Examples of control chart from study with improvement actions made or corrective actions following a special cause variation .....4

Table S1. Observed number of patients, hospital bed-days and costs by hospital .....5

Appendix. Models specifications .....6

Appendix. Marginal standardization method .....7

Table S2. Comparison of economic outcomes by hospital group including patients with missing household income .....8

## Appendix. Components of Control Chart–Based Program

A tutorial to reproduce the control chart program with slideshows, videos and logbook is available at: <http://shewhart.univ-lyon1.fr/>. Key elements on how to develop and interpret a p-chart for clinical practice and how to successfully integrate this tool within a comprehensive approach can also be found online at: <https://academic.oup.com/intqhc/article/22/5/402/1786749>. This includes an open access tutorial accompanied with supplementary material and tools containing fictive data, parameter calculations and chart plotting, so that the reader can easily replicate the method.

Sample slideshow with set of control charts on the colorectal surgery used during team meetings.

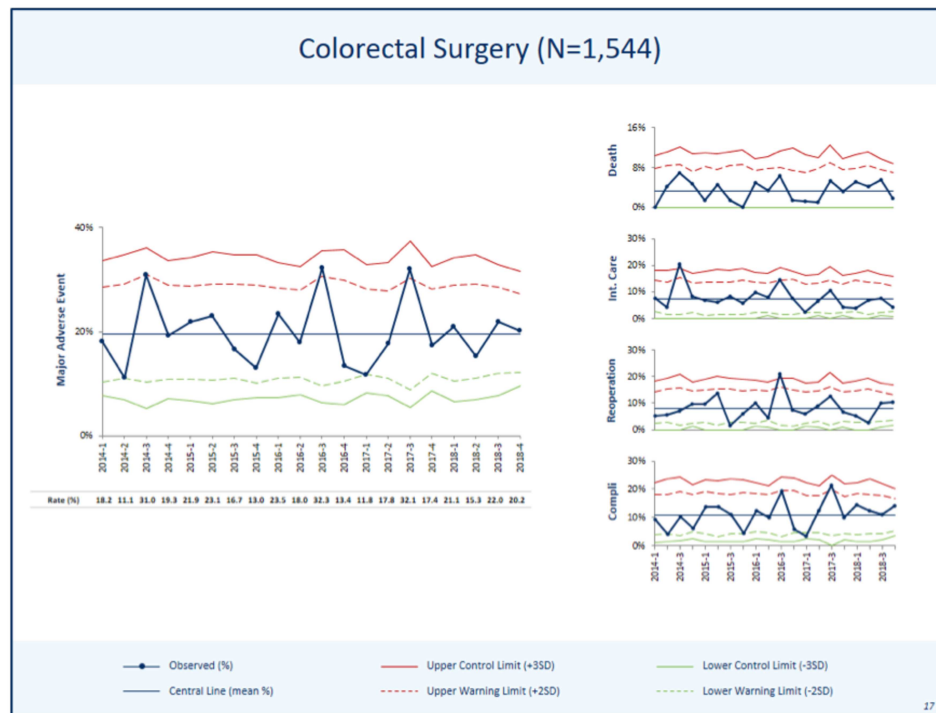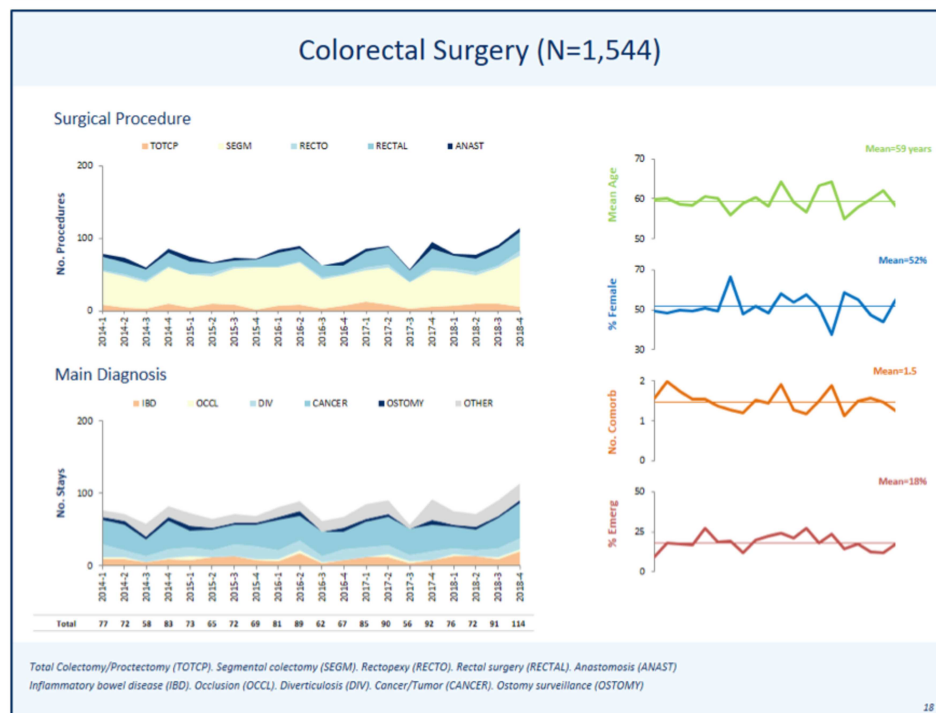

## Appendix. Compliance with Control Chart–Based Program Implementation

Compliance of each surgical centre with the intervention was measured based on a six-item scoring system, designed prior to the intervention to evaluate the following elements of the intervention: formation of the surgeon duo, participation in all 3 training sessions, logbook updated over 2 years until the end of the intervention, posters displayed in operating room every quarter, team meetings held for interpreting control charts every quarter, at least one concrete action tested for care improvement.

| Hospital Number                          | 1    | 2 | 3 | 4 | 5 | 6 | 7 | 8 | 9 | 10       | 11 | 12 | 13 | 14 | 15 | 16 | 17 | 18 | 19   | 20 | Total |
|------------------------------------------|------|---|---|---|---|---|---|---|---|----------|----|----|----|----|----|----|----|----|------|----|-------|
| Duo formed with a surgeon                | 1    | 1 | 1 | 1 | 1 | 1 | 1 | 1 | 1 | 1        | 1  | 1  | 1  | 1  | 1  | 1  | 1  | 1  | 1    | 1  | 20    |
| Participation in all 3 training sessions | 1    | 1 | 1 | 1 | 1 | 1 | 1 | 1 | 1 | 1        | 1  | 1  | 1  | 1  | 1  | 1  | 1  | 1  | 1    | 1  | 18    |
| Logbook updated until the end            | 1    | 1 | 1 | 1 | 1 | 1 | 1 | 1 | 1 | 1        | 1  | 1  | 1  | 1  | 1  | 1  | 1  | 1  | 1    | 1  | 9     |
| 8 posters displayed in operating room    | 1    | 1 | 1 | 1 | 1 | 1 | 1 | 1 | 1 | 1        | 1  | 1  | 1  | 1  | 1  | 1  | 1  | 1  | 1    | 1  | 7     |
| 8 team meetings held                     | 1    | 1 | 1 | 1 | 1 | 1 | 1 | 1 | 1 | 1        | 1  | 1  | 1  | 1  | 1  | 1  | 1  | 1  | 1    | 1  | 12    |
| At least one improvement action tested   | 1    | 1 | 1 | 1 | 1 | 1 | 1 | 1 | 1 | 1        | 1  | 1  | 1  | 1  | 1  | 1  | 1  | 1  | 1    | 1  | 19    |
| Implementation Score                     | 6    | 6 | 6 | 6 | 6 | 5 | 5 | 5 | 5 | 4        | 4  | 4  | 4  | 3  | 3  | 3  | 3  | 3  | 2    | 2  | 4.3   |
| Compliance degree                        | High |   |   |   |   |   |   |   |   | Moderate |    |    |    |    |    |    |    |    | Poor |    |       |

### Results of compliance of individual centers with program implementation.

| Intervention components         | Implementation score (N = 20 hospitals)       | Details                                                                                                                                                                                                                                                                                                                                                                                                                                                                                                                                                                                                                                                                                                                                                                                                                                                                                                                                                                                                                      |
|---------------------------------|-----------------------------------------------|------------------------------------------------------------------------------------------------------------------------------------------------------------------------------------------------------------------------------------------------------------------------------------------------------------------------------------------------------------------------------------------------------------------------------------------------------------------------------------------------------------------------------------------------------------------------------------------------------------------------------------------------------------------------------------------------------------------------------------------------------------------------------------------------------------------------------------------------------------------------------------------------------------------------------------------------------------------------------------------------------------------------------|
| Duos formation                  | Duo formed with a surgeon: 100%               | <ul style="list-style-type: none"> <li>◦ Duos not with 2 surgeons: 60%</li> <li>◦ Turnover within duo during the study: 20%</li> </ul>                                                                                                                                                                                                                                                                                                                                                                                                                                                                                                                                                                                                                                                                                                                                                                                                                                                                                       |
| Training sessions participation | Participation in all 3 training sessions: 90% | <ul style="list-style-type: none"> <li>◦ Training sessions: 1   2   3</li> <li>◦ Number of hospitals: 20   20   18</li> <li>◦ Number of participants: 37   36   33</li> <li>◦ Satisfaction score (/10): 8.2   8.0   8.7</li> <li>◦ Investment score (/10): 8.9   8.3   8.0</li> </ul>                                                                                                                                                                                                                                                                                                                                                                                                                                                                                                                                                                                                                                                                                                                                        |
| Logbook maintenance             | Logbook updated until the end: 45%            | <ul style="list-style-type: none"> <li>◦ Mean number of changes recorded per hospital: 19.5</li> <li>◦ Type of changes* (n = 390): <ul style="list-style-type: none"> <li>- Patient: 10%</li> <li>- Healthcare worker: 18%</li> <li>- Equipment: 10%</li> <li>- Organization: 31%</li> <li>- Clinical practice: 9%</li> <li>- Unspecified: 22%</li> </ul> </li> </ul>                                                                                                                                                                                                                                                                                                                                                                                                                                                                                                                                                                                                                                                        |
| Poster display                  | 8 posters displayed in operating room: 35%    | <ul style="list-style-type: none"> <li>◦ Posters transmitted: 100%</li> <li>◦ Mean number of posters displayed per hospital: 5.0</li> <li>◦ Selfie of duo with the first poster displayed: 100%</li> </ul>                                                                                                                                                                                                                                                                                                                                                                                                                                                                                                                                                                                                                                                                                                                                                                                                                   |
| Control chart team meetings     | 8 team meetings held: 60%                     | <ul style="list-style-type: none"> <li>◦ Slideshows transmitted: 100%</li> <li>◦ Mean number of team meeting per hospital: 6.9</li> <li>◦ Mean duration of team meeting (min): 53.9</li> <li>◦ Mean number of participants per team meeting: 9.3</li> <li>◦ Selfie of team meeting: 50%</li> </ul>                                                                                                                                                                                                                                                                                                                                                                                                                                                                                                                                                                                                                                                                                                                           |
| Improvement plan implementation | At least one improvement plan tested: 95%     | <ul style="list-style-type: none"> <li>◦ Mean number of improvement plans tested per hospital: 3.1</li> <li>◦ Types of improvement actions* (n = 61): <ul style="list-style-type: none"> <li>- Patient (e.g., identity monitoring, abdominal wall surgery work group, post-operative notes for at-risk patients): 6%</li> <li>- Healthcare workers (e.g., specific training for new team members, clarification of surgeon/anaesthesiologist roles, defining the role of the scrub nurse): 13%</li> <li>- Equipment (e.g., anastomosis instrument modification, laparoscopy column modification, audit of operating room materials): 5%</li> <li>- Organization (e.g., programmed prehabilitation, modification in clinical/care pathways, morbidity and mortality reviews with multidisciplinary staff, management of hospital beds, surgical forms): 70%</li> <li>- Clinical practice (e.g., systematic stoma repair, operating room setup, pre-filled prescriptions for compression stockings): 6%</li> </ul> </li> </ul> |

# Appendix. Examples of control chart from study with improvement actions made or corrective actions following a special cause variation

Control chart (Hospital A) shows the morbidity and mortality outcomes for all digestive surgeries of a surgical department in the intervention group during the observation and intervention periods. This chart shows a period of time when rates of morbidity and mortality were held relatively constant, at around 8%. The surgical department took advantage of this period of stability to implement and test several improvement actions. First, they reevaluated the surgical and anesthetic responsibilities of the health care professionals in the surgical department. Second, they made several changes related to equipment, including pre-filing prescription for contention stockings and changing the laparoscopy column, and began systematically repairing stomas. Finally, they decided to make an organizational change in the operating room. These changes resulted in a trend towards reduced rates of morbidity and mortality.

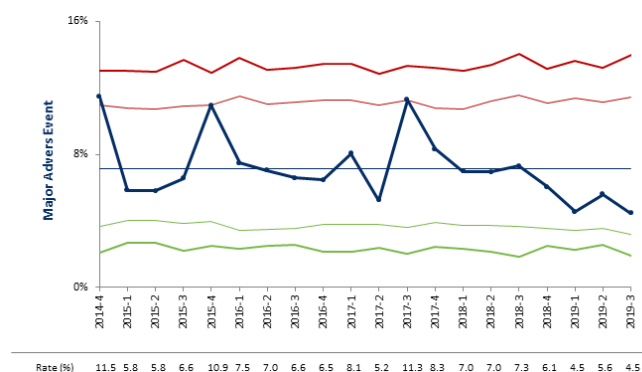

*Morbidity and mortality for all digestive surgeries (Hospital A)*

Control chart (Hospital B) shows the rates of intensive care stays of all digestive surgery patients from a surgical department in the intervention group during the observation and intervention periods. The chart shows that the department experienced special cause variation during the second trimester of 2017. In response, this surgical department implemented several corrective improvement actions. For example, they established that a single surgeon would be in charge of supervising all patients in the intensive care unit. They also decided to no longer systematically send surgical patients to the intensive care unit. In addition, they established an operating room dedicated to treating urgent cases. Together, these changes resulted in improvement in rates of intensive care stays.

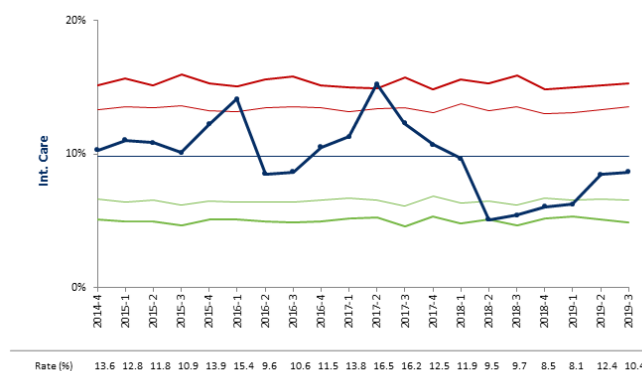

*Intensive care stay for all digestive surgeries (Hospital B)*

Table S1. Observed number of patients, hospital bed-days and costs by hospital

| Hospital group         | Hospital ID  | No. of patients    |               |               | No. of hospital bed-days |                  |            |                                                    | Hospital costs, €  |                  |              |                                                    |
|------------------------|--------------|--------------------|---------------|---------------|--------------------------|------------------|------------|----------------------------------------------------|--------------------|------------------|--------------|----------------------------------------------------|
|                        |              | Total              |               |               | Total                    | Mean per patient |            | Total Observed minus Expected in Imp. <sup>a</sup> | Total              | Mean per patient |              | Total Observed minus Expected in Imp. <sup>b</sup> |
|                        |              | Pre-imp. plus Imp. | Pre-imp.      | Imp.          | Pre-imp. plus Imp.       | Pre-imp.         | Imp.       |                                                    | Pre-imp. plus Imp. | Pre-imp.         | Imp.         |                                                    |
| Intervention hospitals | 1            | 3115               | 1573          | 1542          | 21 514                   | 6,8              | 7,0        | 321                                                | 15 107 475         | 4749             | 4953         | 314 147                                            |
|                        | 2            | 3200               | 1603          | 1597          | 26 450                   | 8,5              | 8,1        | -675                                               | 23 062 872         | 7003             | 7412         | 653 965                                            |
|                        | 3            | 5362               | 2914          | 2448          | 30 775                   | 5,8              | 5,6        | -574                                               | 24 927 681         | 4609             | 4696         | 213 522                                            |
|                        | 4            | 5646               | 2834          | 2812          | 35 605                   | 6,4              | 6,2        | -482                                               | 27 989 238         | 4835             | 5081         | 693 537                                            |
|                        | 5            | 4237               | 1784          | 2453          | 38 618                   | 9,9              | 8,5        | -3325                                              | 31 119 425         | 7509             | 7225         | -694 723                                           |
|                        | 6            | 2756               | 1625          | 1131          | 17 430                   | 6,6              | 5,9        | -819                                               | 12 498 621         | 4632             | 4396         | -266 462                                           |
|                        | 7            | 3185               | 1143          | 2042          | 15 907                   | 6,3              | 4,2        | -4293                                              | 10 173 638         | 3653             | 2938         | -1 459 750                                         |
|                        | 8            | 3768               | 2049          | 1719          | 34 265                   | 8,7              | 9,5        | 1366                                               | 27 454 245         | 6679             | 8010         | 2 287 263                                          |
|                        | 9            | 4687               | 2311          | 2376          | 29 648                   | 6,6              | 6,1        | -1206                                              | 24 373 793         | 5322             | 5082         | -570 120                                           |
|                        | 10           | 4446               | 2073          | 2373          | 35 013                   | 8,5              | 7,3        | -2901                                              | 26 953 381         | 6481             | 5697         | -1 860 523                                         |
|                        | 11           | 3247               | 1751          | 1496          | 21 508                   | 6,7              | 6,6        | -166                                               | 7 954 759          | 2419             | 2486         | 101 364                                            |
|                        | 12           | 2579               | 1290          | 1289          | 13 768                   | 5,7              | 5,0        | -916                                               | 10 658 637         | 4293             | 3973         | -412 283                                           |
|                        | 13           | 3856               | 1964          | 1892          | 22 080                   | 5,7              | 5,8        | 210                                                | 17 678 547         | 4367             | 4811         | 839 396                                            |
|                        | 14           | 5705               | 2768          | 2937          | 47 648                   | 8,8              | 7,9        | -2572                                              | 41 037 916         | 7593             | 6817         | -2 278 996                                         |
|                        | 15           | 4322               | 2177          | 2145          | 24 728                   | 5,8              | 5,7        | -160                                               | 22 877 218         | 5278             | 5309         | 65 470                                             |
|                        | 16           | 2693               | 1409          | 1284          | 19 218                   | 7,4              | 6,9        | -648                                               | 16 036 247         | 5912             | 6001         | 114 127                                            |
|                        | 17           | 2843               | 1423          | 1420          | 17 073                   | 6,3              | 5,7        | -818                                               | 11 883 411         | 4188             | 4172         | -22 387                                            |
|                        | 18           | 3748               | 2012          | 1736          | 19 908                   | 5,2              | 5,5        | 460                                                | 9 048 086          | 2381             | 2452         | 123 718                                            |
|                        | 19           | 2815               | 1465          | 1350          | 20 025                   | 7,2              | 7,1        | -120                                               | 15 035 316         | 5288             | 5399         | 149 980                                            |
|                        | 20           | 2837               | 1411          | 1426          | 18 379                   | 6,6              | 6,4        | -211                                               | 16 588 248         | 5902             | 5793         | -156 427                                           |
|                        | <b>Total</b> | <b>75 047</b>      | <b>37 579</b> | <b>37 468</b> | <b>509 560</b>           | <b>7,0</b>       | <b>6,6</b> | <b>-14633</b>                                      | <b>392 458 755</b> | <b>5225</b>      | <b>5234</b>  | <b>326 719</b>                                     |
| Control hospitals      | 21           | 6497               | 3404          | 3093          | 41 310                   | 6,5              | 6,2        | -989                                               | 29 828 783         | 4537             | 4651         | 352 120                                            |
|                        | 22           | 5292               | 2785          | 2507          | 37 184                   | 7,1              | 7,0        | -164                                               | 27 243 888         | 5128             | 5170         | 105 459                                            |
|                        | 23           | 4822               | 2418          | 2404          | 39 323                   | 8,5              | 7,8        | -1901                                              | 30 000 145         | 6242             | 6201         | -98 198                                            |
|                        | 24           | 4469               | 2245          | 2224          | 38 189                   | 8,9              | 8,2        | -1367                                              | 28 955 945         | 6461             | 6498         | 80 819                                             |
|                        | 25           | 2092               | 1161          | 931           | 12 760                   | 6,6              | 5,5        | -994                                               | 8 406 055          | 4120             | 3891         | -213 806                                           |
|                        | 26           | 4349               | 2252          | 2097          | 31 680                   | 7,1              | 7,4        | 667                                                | 27 242 142         | 6259             | 6269         | 21 674                                             |
|                        | 27           | 2253               | 1221          | 1032          | 13 078                   | 5,9              | 5,7        | -270                                               | 5 955 769          | 2501             | 2812         | 320 303                                            |
|                        | 28           | 2696               | 1324          | 1372          | 17 143                   | 6,9              | 5,9        | -1415                                              | 6 590 689          | 2637             | 2259         | -517 699                                           |
|                        | 29           | 3235               | 1713          | 1522          | 24 770                   | 8,1              | 7,1        | -1459                                              | 18 893 144         | 6113             | 5533         | -882 954                                           |
|                        | 30           | 3343               | 1741          | 1602          | 29 552                   | 8,4              | 9,4        | 1604                                               | 23 198 054         | 6391             | 7535         | 1 833 846                                          |
|                        | 31           | 3504               | 1856          | 1648          | 21 234                   | 6,3              | 5,8        | -789                                               | 11 553 276         | 3478             | 3093         | -633 880                                           |
|                        | 32           | 7211               | 3722          | 3489          | 64 978                   | 9,2              | 8,8        | -1157                                              | 57 815 406         | 8099             | 7931         | -583 022                                           |
|                        | 33           | 4988               | 2810          | 2178          | 30 271                   | 5,8              | 6,4        | 1378                                               | 16 387 378         | 3179             | 3422         | 528 149                                            |
|                        | 34           | 2627               | 1365          | 1262          | 15 391                   | 6,3              | 5,4        | -1093                                              | 7 842 732          | 3083             | 2880         | -255 785                                           |
|                        | 35           | 4280               | 2306          | 1974          | 26 264                   | 5,9              | 6,4        | 1083                                               | 18 235 245         | 4064             | 4490         | 840 204                                            |
|                        | 36           | 5292               | 2494          | 2798          | 35 738                   | 7,0              | 6,5        | -1416                                              | 31 221 821         | 5899             | 5900         | 3067                                               |
|                        | 37           | 2164               | 1202          | 962           | 14 191                   | 6,2              | 6,9        | 667                                                | 4 974 241          | 2221             | 2396         | 167 809                                            |
|                        | 38           | 3645               | 1777          | 1868          | 26 135                   | 7,2              | 7,1        | -168                                               | 19 976 333         | 5287             | 5665         | 706 524                                            |
|                        | 39           | 4796               | 2355          | 2441          | 38 838                   | 8,1              | 8,0        | -245                                               | 29 601 817         | 6193             | 6152         | -100 463                                           |
|                        | 40           | 2760               | 1397          | 1363          | 16 845                   | 6,4              | 5,8        | -764                                               | 12 832 787         | 5001             | 4289         | -970 826                                           |
|                        | <b>Total</b> | <b>80 315</b>      | <b>41 548</b> | <b>38 767</b> | <b>574 874</b>           | <b>7,2</b>       | <b>7,1</b> | <b>-6984</b>                                       | <b>416 755 649</b> | <b>5146</b>      | <b>5235</b>  | <b>3 452 065</b>                                   |
| <b>Total</b>           |              | <b>155 362</b>     | <b>79 127</b> | <b>76 235</b> | <b>1 084 434</b>         | <b>7,1</b>       | <b>6,8</b> | <b>-21 945</b>                                     | <b>809 214 404</b> | <b>5 184</b>     | <b>5 234</b> | <b>3 878 672</b>                                   |

Pre. imp., pre-implementation period; Imp., Implementation period.

<sup>a</sup> Difference = (Total observed No. of bed-days in Implementation period) – (Total expected No. of bed-days in Implementation period), with:  
 Total expected No. of bed-days in Implementation period = (Total observed No. of patients in Implementation period) \* [ (Total observed No. of bed-days in Pre-implementation period) / (Total observed No. of patients in Pre-implementation period) ]

<sup>b</sup> Difference = (Total observed hospital costs in Implementation period) – (Total expected hospital costs in Implementation period), with:  
 Total expected hospital costs in Implementation period = (Total observed No. of patients in Implementation period) \* [ (Total observed hospital costs in Pre-implementation period) / (Total observed No. of patients in Pre-implementation period) ]

## Appendix. Models specifications

To model the mean number of hospital bed-days per patient within 30 days following surgery and the mean hospital costs reimbursed for this care per patient by the insurer, we computed generalized linear mixed models (GLMM) with a log link and a random intercept for hospitals.

### General mathematical formulation of GLMM

$$\begin{aligned} Y_i | \mathbf{u} &\sim \text{indep. } f_{Y_i | \mathbf{u}}(y_i | \mathbf{u}), \\ f_{Y_i | \mathbf{u}}(y_i | \mathbf{u}) &= \exp \left\{ \frac{[y_i \eta_i - b(\eta_i)]}{\tau^2} - c(y_i, \tau) \right\}, \\ E[Y_i | \mathbf{u}] &= \mu_i, \\ g(\mu_i) &= \mathbf{x}_i' \boldsymbol{\beta} + \mathbf{z}_i' \mathbf{u}, \\ \mathbf{u} &\sim f_U(\mathbf{u}), \end{aligned}$$

with the following specifications:

- the distribution of  $Y_i$  from an exponential family (in this case the distribution is assumed to hold conditional on the random effects  $\mathbf{u}$ ),
- a link function,  $g(\cdot)$  is applied to the conditional mean of  $Y_i$  given  $\mathbf{u}$  to obtain the conditional linear predictor,
- the linear predictor is assumed to consist of two components, the fixed effect portion, described as  $\mathbf{x}_i' \boldsymbol{\beta}$  and the random effects portion,  $\mathbf{z}_i' \mathbf{u}$ , for which a distribution is assigned to  $\mathbf{u}$ .

[from McCulloch, C. E. *Generalized Linear Mixed Models*. (IMS, 2003).]

### Equation of the models used for the number of hospital bed-days and costs

Let  $y_{ij}$  represent the number of hospital bed-days or costs for patient  $j$  at hospital  $i$  within the 30-days following the surgery.

For the hospital bed-days,  $y_{ij}$  follows a negative-binomial distribution with a mean expected number of hospital bed-days of  $\mu_{ij}$ .

For the hospital costs,  $y_{ij}$  follows a gamma distribution with a mean expected hospital cost of  $\mu_{ij}$ .

Independent variables incorporated in the models were the period and the study group with their interaction, the death status and the patient expected number of hospital bed-days or costs consumption with their interaction.

$$\ln(\mu_{ij}) = \beta_0 + \mathbf{u}_{0i} + \beta_1 \text{POST}_{ij} + \beta_2 \text{INTER}_{ij} + \beta_3 \text{POST} \times \text{INTER}_{ij} + \beta_4 \text{DEATH}_{ij} + \beta_5 \text{SCOREQ2}_{ij} + \beta_6 \text{SCOREQ3}_{ij} + \beta_7 \text{SCOREQ4}_{ij} + \beta_8 \text{DEATH} \times \text{SCOREQ2}_{ij} + \beta_9 \text{DEATH} \times \text{SCOREQ3}_{ij} + \beta_{10} \text{DEATH} \times \text{SCOREQ4}_{ij}$$

$\beta_0$  the fixed intercept

$\mathbf{u}_{0i}$  the random intercept for hospital  $i$ ,  $\sim N(0, \psi)$

$\text{POST}_{ij}=1$  if implementation period and 0 if pre-implementation period

$\text{INTER}_{ij}=1$  if intervention group and 0 if control group

$\text{DEATH}_{ij}=1$  if deceased and 0 if alive

$\text{SCOREQ2}_{ij}=1$  if patient expected number of bed-days consumption quartile 2 and 0 otherwise

$\text{SCOREQ3}_{ij}=1$  if patient expected number of bed-days consumption quartile 3 and 0 otherwise

$\text{SCOREQ4}_{ij}=1$  if patient expected number of bed-days consumption quartile 4 and 0 otherwise

$\beta_{k,k=1,\dots,10}$  the fixed-effect regression coefficients

The ratio of rate ratios (RRR) or ratio of cost ratios (RCR) was estimated by exponentiating  $\beta_3$ , the regression coefficient corresponding to the interaction between  $\text{POST}_{ij}$  and  $\text{INTER}_{ij}$ .

## Appendix. Marginal standardization method

We calculated standardized rates of hospital bed-days and standardized hospital costs for each group and period using estimated regression coefficients obtained from generalized linear mixed models (GLMM) and a marginal standardization method inspired from Austin et al.<sup>1</sup> and Muller et al.<sup>2</sup>.

We computed the predicted number of hospital bed-days and costs for each patient if the whole study population were in the Intervention hospitals during the Pre-implementation period, then if the whole study population were in the Control hospitals during the Pre-implementation period, then if the whole study population were in the Intervention hospitals during the Implementation period, and then if the whole study population were in the Control hospitals during the Implementation period.

To do so, after performing the GLMM, we set the study group to Intervention and the period to Pre-implementation for every patient, and used the regression coefficients to calculate predicted number of hospital bed-days and costs for every patient at their observed confounder pattern and newly assigned exposure value (hospital group and study period). Then we averaged these predicted number of hospital bed-days and costs across the study cohort to obtain the standardized rates of hospital bed-days and standardized hospital cost in Intervention hospitals during the Pre-implementation period. We proceeded in the same way to compute the standardized rates of hospital bed-days and costs in Control hospitals during the Pre-implementation period, in Intervention hospitals during the Implementation period, and in Control hospitals during the Implementation period.

Use of these standardized rates of hospital bed-days and costs allowed us to compare economic outcomes between 4 populations whose only difference is the exposure (hospital group and study period).

---

<sup>1</sup> Austin, P. C. Absolute risk reductions, relative risks, relative risk reductions, and numbers needed to treat can be obtained from a logistic regression model. *J. Clin. Epidemiol.* **63**, 2–6 (2010).

<sup>2</sup> Muller, C. J. & MacLehose, R. F. Estimating predicted probabilities from logistic regression: different methods correspond to different target populations. *Int. J. Epidemiol.* **43**, 962–970 (2014).

Table S2. Comparison of economic outcomes by hospital group including patients with missing household income

| Economic Outcomes           | Intervention Hospitals           |                |                                      | Control Hospitals                |                |                                      | Intervention vs Control Hospitals             |         |
|-----------------------------|----------------------------------|----------------|--------------------------------------|----------------------------------|----------------|--------------------------------------|-----------------------------------------------|---------|
|                             | Pre-implementation               | Implementation | Implementation vs Pre-implementation | Pre-implementation               | Implementation | Implementation vs Pre-implementation |                                               |         |
|                             | Mean Observed Number Per Patient |                | Adjusted Rate or Cost Ratio (95% CI) | Mean Observed Number Per Patient |                | Adjusted Rate or Cost Ratio (95% CI) | Adjusted Ratio of Rate or Cost Ratio (95% CI) | P value |
| Number of hospital bed-days | 7.0                              | 6.6            | 0.91 (0.90-0.92)                     | 7.2                              | 7.1            | 0.94 (0.93-0.95)                     | 0.97 (0.95-0.98)                              | < .001  |
| Hospital costs, €           | 5226                             | 5237           | 0.95 (0.95-0.96)                     | 5132                             | 5239           | 0.96 (0.96-0.97)                     | 0.99 (0.98-1.00)                              | .049    |

A total of 156 133 patients were included in the analysis. Missing household incomes for 771 patients were imputed by the mean household income of patients with available household income in the same hospital group (Intervention/Control) and period (Pre-implementation/Implementation). Adjusted rate or cost ratios were estimated using multivariable generalized linear mixed models with a log link to compare economic outcomes between pre-implementation and implementation periods in intervention and control hospitals. A negative binomial distribution was used to model the mean number of hospital bed-days per patient within 30 days following surgery, and a gamma distribution to model mean hospital costs reimbursed for this care per patient by the insurer. Adjusted ratios of rate ratios (RRR) or ratios of cost ratios (RCR) captured the control chart impact by comparing the change in outcomes from the pre-implementation to implementation periods between the intervention and control hospitals based on a difference-in-difference approach. A RRR or RCR value less than unity indicated improvement caused by control charts in intervention versus control hospitals. Estimates with corresponding 95% confidence interval (95% CI) considered clustering of patients at the hospital level. Outcomes were adjusted for the patient expected number of health care consumption, death status within 30 days following surgical procedure, and their interaction. The patient expected number of health care consumption was introduced in models as a categorical variable (quartiles), and considered age, sex, presence of comorbidities, emergency admission, date and operative procedure, main diagnosis, surgical procedure complexity, median household income for patient-level covariates, and status for hospital-level covariates. €1.00 (£0.83; \$1.09).
